## Serum Osteocalcin Level Is Associated with Glucose Metabolism and Atherosclerosis Parameters in Type 2 Diabetes Mellitus

Ippei Kanazawa, Toru Yamaguchi, Masahiro Yamamoto, Mika Yamauchi, Soichi Kurioka, Shozo Yano, and Toshitsugu Sugimoto

Department of Internal Medicine 1, Shimane University School of Medicine, Shimane 693-8501, Japan

**Context:** Recent animal studies showed that osteocalcin action is related to not only bone metabolism but also glucose metabolism and fat mass. We investigated the relationship between two bone formation markers, serum osteocalcin and bone-specific alkaline phosphatase, and glucose metabolism, serum adiponectin, and the amount of fat mass as well as atherosclerosis parameters in men and postmenopausal women with type 2 diabetes.

**Methods:** A total of 179 men and 149 postmenopausal women were recruited consecutively, and radiographic and biochemical characteristics were collected. Brachial-ankle pulse wave velocity (baPWV) and intima-media thickness (IMT) were evaluated as the parameters of atherosclerosis.

**Results:** Multiple regression analysis adjusted for age, duration of diabetes, body mass index, and serum creatinine showed that osteocalcin negatively correlated with fasting plasma glucose and hemoglobin A<sub>1c</sub> in both men and postmenopausal women ( $P < 0.05$ ) and with percent fat, baPWV, and IMT in men ( $P < 0.05$ ). Osteocalcin positively correlated with total adiponectin in postmenopausal women ( $P < 0.001$ ). After additional adjustments for systolic blood pressure, low-density lipoprotein-cholesterol, high-density lipoprotein-cholesterol, hemoglobin A<sub>1c</sub>, and Brinkmann index, osteocalcin still significantly and negatively correlated with baPWV and IMT in men. In contrast, osteocalcin did not correlate with fasting C-peptide, and bone-specific alkaline phosphatase did not correlate with any variable in either men or postmenopausal women.

**Conclusions:** Serum osteocalcin is associated with glucose and total adiponectin levels, fat mass, and atherosclerosis parameters in patients with type 2 diabetes, suggesting that osteocalcin is important for not only bone metabolism but also glucose and fat metabolism. (*J Clin Endocrinol Metab* 94: 45–49, 2009)

Several studies have shown that osteoporosis is associated with cardiovascular disease and influences mortality (1–5). Although both diseases are traditionally viewed as separate entities that increase in prevalence with aging, accumulating evidence indicates that similar pathophysiological mechanisms lead to them. Arterial calcification, like osteogenesis, involves a complex interaction of various cells that produce matrix vesicles and subsequent mineralization. Previous studies have shown that bone-associated proteins, such as osteocalcin,  $\gamma$ -carboxyglutamic acid (Gla) protein, osteopontin, osteoprotegerin, and receptor-activated nuclear factor- $\kappa$  B ligand, were found in ath-

erosclerotic arteries (6–8), suggesting that these proteins could be directly associated with vascular diseases.

Osteocalcin, one of the osteoblast-specific proteins, has several hormonal features and is secreted in the general circulation from osteoblastic cells (9, 10). Recently, Lee *et al.* (11) showed that osteocalcin functions as a hormone that regulates glucose metabolism and fat mass in genetically modified mouse. Osteocalcin-knockout mice display decreased  $\beta$ -cell proliferation, glucose intolerance, and insulin resistance. Moreover, Ferron *et al.* (12) showed that osteocalcin administration regulated gene expression in  $\beta$ -cells and adipocytes (including adiponectin expres-

ISSN Print 0021-972X ISSN Online 1945-7197  
Printed in U.S.A.

Copyright © 2009 by The Endocrine Society

doi: 10.1210/jc.2008-1455 Received July 8, 2008. Accepted October 27, 2008.

First Published Online November 4, 2008

Abbreviations: BAP, Bone-specific alkaline phosphatase; baPWV, brachial-ankle pulse wave velocity; BMI, body mass index; C, cholesterol; CV, coefficient of variation; %Fat, percent fat; FPG, fasting plasma glucose; Gla,  $\gamma$ -carboxyglutamic acid; HbA<sub>1c</sub>, hemoglobin A<sub>1c</sub>; HDL, high-density lipoprotein; HMW, high molecular weight; IMT, intima-media thickness; LDL, low-density lipoprotein; MGP, matrix Gla protein.

sion) and affected the development of metabolic diseases, obesity, and type 2 diabetes in wild-type mice. Although these findings support the concept that bone metabolism and glucose/fat metabolism are associated with each other through the action of osteocalcin, little is known about whether serum osteocalcin level is associated with glucose, fat mass, adiponectin, or atherosclerosis parameters in humans.

In this study, to address this issue, we measured two bone formation markers, osteocalcin and bone-specific alkaline phosphatase (BAP), as well as serum total and high-molecular-weight (HMW) adiponectin, body composition, abdominal fat area, and parameters of atherosclerosis, such as brachial-ankle pulse wave velocity (baPWV) and ultrasonographically evaluated intima-media thickness (IMT); we measured these parameters in Japanese men and postmenopausal women with type 2 diabetes, and investigated their relationships to serum osteocalcin and BAP levels.

## Subjects and Methods

### Subjects

The participants in this study were 179 men and 149 postmenopausal women with type 2 diabetes (age range 50–83 and 50–84 yr; mean 64.9 and 66.7, respectively). We consecutively recruited patients who visited Shimane University Hospital for education, evaluation, or treatment of diabetes. The baseline characteristics of the patients are shown in Table 1. All women had been without spontaneous menses for more than 1 yr. Nobody had hepatic or renal dysfunction or nutritional derangements.

**TABLE 1.** Baseline characteristics of subjects

|                                          | Men          | Women        | P       |
|------------------------------------------|--------------|--------------|---------|
| Number of subjects                       | 179          | 149          |         |
| Age (yr)                                 | 64.9 ± 8.2   | 66.7 ± 8.9   | 0.0583  |
| Duration of diabetes (yr)                | 12.0 ± 9.1   | 12.0 ± 10.0  | 0.9797  |
| Body height (cm)                         | 164.0 ± 6.5  | 150.2 ± 5.7  | <0.0001 |
| Body weight (kg)                         | 61.0 ± 9.6   | 54.4 ± 10.4  | <0.0001 |
| BMI (kg/m <sup>2</sup> )                 | 22.6 ± 2.9   | 24.1 ± 4.4   | 0.0003  |
| Systolic blood pressure (mm Hg)          | 128 ± 16     | 130 ± 19     | 0.3213  |
| Diastolic blood pressure (mm Hg)         | 76 ± 11      | 74 ± 11      | 0.0976  |
| %Fat (%)                                 | 19.5 ± 4.4   | 29.5 ± 6.7   | <0.0001 |
| Trunk fat (%)                            | 49.9 ± 5.9   | 50.9 ± 6.4   | 0.2389  |
| Visceral fat area (cm <sup>2</sup> )     | 113.0 ± 64.1 | 105.9 ± 64.2 | 0.3823  |
| Subcutaneous fat area (cm <sup>2</sup> ) | 103.2 ± 49.1 | 181.6 ± 95.8 | <0.0001 |
| Visceral to sc fat ratio                 | 1.17 ± 0.62  | 0.68 ± 0.74  | <0.0001 |
| FPG (mg/dl)                              | 173 ± 57     | 164 ± 62     | 0.1825  |
| HbA <sub>1c</sub> (%)                    | 9.1 ± 2.4    | 8.9 ± 2.5    | 0.5162  |
| Fasting C-peptide (ng/ml)                | 1.6 ± 0.8    | 1.6 ± 0.8    | 0.7358  |
| LDL-C (mg/dl)                            | 108 ± 34     | 119 ± 39     | 0.0074  |
| HDL-C (mg/dl)                            | 52 ± 16      | 58 ± 17      | 0.0008  |
| Serum creatinine (mg/dl)                 | 0.78 ± 0.15  | 0.62 ± 0.15  | <0.0001 |
| Total adiponectin (μg/ml)                | 6.13 ± 3.64  | 8.88 ± 5.84  | <0.0001 |
| HMW adiponectin (μg/ml)                  | 5.90 ± 4.82  | 9.18 ± 7.38  | <0.0001 |
| BAP (IU/liter)                           | 26.1 ± 8.9   | 32.6 ± 12.4  | <0.0001 |
| Osteocalcin (ng/ml)                      | 5.2 ± 2.3    | 7.2 ± 3.0    | <0.0001 |
| Right baPWV (m/sec)                      | 15.0 ± 2.6   | 15.5 ± 2.6   | 0.1037  |
| Left baPWV (m/sec)                       | 14.7 ± 2.2   | 15.4 ± 2.7   | 0.0145  |
| IMT (mm)                                 | 2.4 ± 1.3    | 2.0 ± 0.9    | 0.0009  |
| Brinkmann index                          | 609 ± 653    | 21 ± 114     | <0.0001 |

The numbers of patients who had been taking insulin, sulfonylurea, metformin, and α-glucosidase inhibitors, respectively, were 37, 64, 23, and 19 men, and 39, 42, 32, and 14 women. Patients treated with thiazolidinedione were excluded from this study. Forty-seven men and 55 women had taken calcium antagonists; 38 men and 47 women had taken angiotensin-converting enzyme inhibitors or angiotensin II receptor blockers for hypertension; 32 men and 54 women had taken 3-hydroxy-3-methylglutaryl coenzyme A reductase inhibitors for dyslipidemia; and 35 men and 23 women had taken aspirin for atherosclerosis. Eighty-two men (45.8%) and 10 (6.7%) women were current smokers. The Brinkmann index was calculated by daily cigarette numbers multiplied by smoking years. All patients were free of drugs known to influence bone and calcium metabolism, such as vitamin D, bisphosphonate, or estrogen, up until the time of the study. This study was cross-sectional in design, approved by the ethical review board of our institution, and complied with the Helsinki Declaration. All patients agreed to participate in the study and provided informed consent.

### Radiography

Fat mass was measured by dual-energy x-ray absorptiometry (QDR-4500; Hologic, Waltham, MA) using whole-body absorptiometry software, and each value was expressed in kilograms. Percent fat mass was calculated by dividing each absolute value of body composition by total body mass. Percent trunk fat was calculated by dividing trunk fat mass by total fat mass. The coefficient of variation (precision) of measurements of fat mass was 2.0% (13).

Abdominal adipose tissue was measured using commercially available computed tomography (Toshiba Medical Systems, Tokyo, Japan), which determined adipose tissue area electronically by setting the attenuation values for the region of interest within a range of –150 and –50 Hounsfield units. Visceral fat area and sc fat area were determined separately with the use of a trace function, which manually defined the boundary between the visceral and sc fat with a cursor.

### Biochemical measurements

After overnight fasting, serum was collected. Biochemical markers were measured by standard biochemical methods. Hemoglobin A<sub>1c</sub> (HbA<sub>1c</sub>) was determined by HPLC. Serum C-peptide was measured by ELISA. Osteocalcin and BAP were measured by RIA and enzyme immuno assay, respectively, as previously described (14, 15). Total adiponectin and HMW adiponectin were measured by ELISA kits (Otsuka Pharmaceuticals, Tokyo, Japan, and Fujirebio, Tokyo, Japan, respectively), as indicated by the manufacturer. The coefficients of variation (CVs) for total adiponectin and HMW adiponectin for each ELISA kit were 3.1 and 2.0%, respectively. Total cholesterol, triglyceride, and high-density lipoprotein (HDL)-cholesterol (C) were evaluated using an enzymatic method. Low-density lipoprotein (LDL)-C was calculated by Friedewald's formula [total cholesterol – (HDL-C + triglyceride/5)] (16).

### Arterial stiffness measurement

baPWV was measured using the VaSera VS-1000 (Fukuda Denshi, Tokyo, Japan), an automated recording device that calculates the time delay between two pulse waves recorded simultaneously, as previously described (17, 18). Briefly, the patient was examined in the supine position, with a volume plethysmographic sensor in cuffs on both the brachia and ankles. After 15 min of rest, the subject's volume pulse form was detected, and time intervals between the wave front of the arm and that of the ankles were calculated. The distance between the arm and sampling points was calculated automatically. The CVs of measurements of left and right pulse wave velocity were 1.37 and 1.31%, respectively. In the present study, the measurement of baPWV was performed on a different occasion from the blood collection so that the participant would be mentally relaxed.

### Ultrasonographic measurement of carotid IMT

B-mode ultrasonographic imaging of the carotid artery was performed using HDI 5000 (Philips, Tokyo, Japan), a high-resolution, real-

time ultrasonograph with a 7.5-MHz transducer, as previously described (17). All scans were performed by two trained sonographers who remained unaware of each other's data. Briefly, the scanning of extracranial carotid arteries in the neck was conducted bilaterally at longitudinal projections and at the transverse projection for measurement of IMT. Each carotid wall was explored to identify the thickest intima-medial sites. IMT was measured as the distance between the lumen-intima interface and the media-adventitia interface on the B-mode image. The CV of measurements of IMT was 3.55%. To quantify carotid artery wall thickness, we used the maximum of IMT in the present study.

### Statistical analysis

Data were expressed as mean  $\pm$  SD. Because serum total and HMW adiponectin showed a markedly skewed distribution, logarithmic (log) transformation of these values was carried out before performing correlation and regression analysis. Simple and multiple regression analysis were performed using the statistical computer program Statview (Abacus Concepts, Berkeley, CA).  $P < 0.05$  was considered to be significant.

## Results

### Baseline characteristics of patients and comparison of parameters between men and postmenopausal women

The baseline characteristics of the patients are shown in Table 1. We compared these parameters between men and postmenopausal women. Body height, body weight, visceral/sc fat ratio, serum creatinine, IMT, and Brinkmann index were significantly higher in the males than in females ( $P < 0.001$ ). On the other hand, body mass index (BMI), percent fat (%Fat), sc fat area, LDL-C, HDL-C, total and HMW adiponectin, BAP, osteocalcin, and left baPWV were significantly lower in the males than in the females (different  $P < 0.05$ ).

### Correlations between serum levels of osteocalcin or BAP and adipose tissue, glucose metabolism, serum levels of adiponectin, and the parameters of atherosclerosis

Because our analysis showed that serum levels of osteocalcin, BAP, adiponectin, and the parameters of atherosclerosis

(baPWV and IMT) were significantly affected by age, body stature, and renal function, multiple regression analyses adjusted for age, duration of diabetes, BMI, and serum creatinine were performed between serum levels of osteocalcin or BAP *vs.* other variables (Table 2). In men, serum osteocalcin significantly and negatively correlated with %Fat, fasting plasma glucose (FPG), and HbA<sub>1c</sub> ( $P = 0.0467$ ,  $P = 0.0013$ , and  $P = 0.0318$ , respectively) as well as right and left baPWV and IMT ( $P = 0.0032$ ,  $P = 0.0072$ , and  $P = 0.0234$ , respectively). In women, serum osteocalcin levels significantly and negatively correlated with FPG and HbA<sub>1c</sub> ( $P = 0.0290$  and  $P = 0.0015$ ) and positively correlated with log (total adiponectin) ( $P = 0.0003$ ) but not with baPWV or IMT. In contrast, serum BAP levels did not correlate with any parameter in either men or women.

### The correlations between serum levels of osteocalcin or BAP *vs.* the parameters of atherosclerosis

Next, to investigate whether serum osteocalcin levels in men were related to baPWV and IMT independent of other established cardiovascular risk factors, multiple regression analysis adjusted for age, duration of diabetes, BMI, serum creatinine, systolic blood pressure, LDL-C, HDL-C, HbA<sub>1c</sub>, and Brinkmann index were performed between serum osteocalcin *vs.* baPWV or IMT. In men, serum osteocalcin level was significantly and inversely correlated with right and left baPWV and IMT ( $r = -0.157$ ,  $P = 0.0149$ ;  $r = -0.132$ ,  $P = 0.0332$ ;  $r = -0.177$ ,  $P = 0.0263$ , respectively), even after being adjusted for those atherosclerosis-related parameters.

## Discussion

In this study, serum osteocalcin level was significantly and negatively correlated with FPG and HbA<sub>1c</sub> in both men and postmenopausal women with type 2 diabetes. Several studies indi-

**TABLE 2.** The correlations between serum levels of osteocalcin or BAP *vs.* adipose tissue, glucose metabolism, serum levels of adiponectin, or the parameters of atherosclerosis

|                          | Osteocalcin |        |        |        | BAP    |        |        |        |
|--------------------------|-------------|--------|--------|--------|--------|--------|--------|--------|
|                          | Men         |        | Women  |        | Men    |        | Women  |        |
|                          | r           | P      | r      | P      | r      | P      | r      | P      |
| %Fat                     | -0.133      | 0.0467 | -0.003 | 0.9592 | -0.084 | 0.2146 | 0.086  | 0.1220 |
| Trunk fat, %             | -0.113      | 0.1282 | -0.113 | 0.2453 | -0.093 | 0.2212 | 0.001  | 0.9906 |
| Visceral fat area        | 0.038       | 0.6171 | -0.049 | 0.4856 | -0.087 | 0.2486 | 0.001  | 0.9934 |
| Subcutaneous fat area    | 0.040       | 0.5538 | 0.027  | 0.6277 | -0.026 | 0.6929 | 0.009  | 0.8754 |
| Visceral to sc fat ratio | -0.048      | 0.5883 | 0.118  | 0.2383 | -0.042 | 0.6395 | 0.145  | 0.1513 |
| Fasting plasma glucose   | -0.242      | 0.0013 | -0.190 | 0.0290 | 0.070  | 0.3479 | -0.162 | 0.0674 |
| HbA <sub>1c</sub>        | -0.164      | 0.0318 | -0.274 | 0.0015 | 0.097  | 0.1936 | -0.111 | 0.2136 |
| Fasting C-peptide        | -0.064      | 0.4038 | 0.039  | 0.6146 | -0.035 | 0.6400 | 0.014  | 0.8535 |
| Log(total adiponectin)   | -0.023      | 0.7666 | 0.301  | 0.0003 | 0.104  | 0.1700 | 0.031  | 0.7281 |
| Log(HMW adiponectin)     | -0.002      | 0.9844 | 0.136  | 0.1059 | 0.148  | 0.0731 | 0.046  | 0.5927 |
| Right baPWV              | -0.204      | 0.0032 | -0.114 | 0.0914 | -0.045 | 0.5169 | -0.061 | 0.3778 |
| Left baPWV               | -0.183      | 0.0072 | -0.055 | 0.4176 | -0.051 | 0.4495 | -0.043 | 0.5313 |
| IMT                      | -0.181      | 0.0234 | 0.022  | 0.8029 | 0.015  | 0.8463 | 0.149  | 0.1010 |

Multiple regression analysis was performed between osteocalcin or BAP *vs.* adipose tissue, glucose metabolism, serum adiponectin, or the parameters of atherosclerosis adjusted for age, duration of diabetes, body mass index, and serum creatinine. Log, Logarithm.

cated that hyperglycemia induces a low turnover of bone with osteoblast dysfunction and suppresses serum osteocalcin levels (19, 20). Gerdhem *et al.* (20) have shown that serum osteocalcin level, but not BAP, was lower in women with diabetes after correction for covariance of body weight and serum creatinine. Okazaki *et al.* (21) have also shown that serum osteocalcin level was low before treatment and elevated after treatment of diabetes. Previous *in vitro* studies have shown that chronic hyperglycemia increases the activity and expression of alkaline phosphatase but decreases osteocalcin expression and cellular calcium uptake (22); this finding explains the discrepancy in serum levels of osteocalcin and BAP in clinical studies. Our findings are consistent with these observations and indicate that serum osteocalcin level, but not BAP, was specifically suppressed by hyperglycemia in diabetic patients.

Recent animal studies showed that osteocalcin-knockout mice had glucose intolerance and insulin resistance (11), and osteocalcin administration improved these derangements by enhancing the expression of insulin genes and proliferation markers in pancreatic  $\beta$ -cells (11, 12). These data suggest not only that hyperglycemia suppresses osteocalcin expression in osteoblasts but also serum osteocalcin secreted from osteoblasts into the circulation could modulate pancreatic  $\beta$ -cell function and improve glucose metabolism. However, we found that there was no correlation between serum osteocalcin level and fasting C-peptide, which is a surrogate marker for endogenous insulin secretion. This might be because patients in these studies have received several treatments that affect insulin secretion, including sulfonylureas and exogenous insulin. Therefore, we are unable to completely exclude the effects of these drugs when interpreting the association between serum osteocalcin level and insulin secretion.

Patients with osteoporosis are known to have an increased incidence of cardiovascular disease (1–5). Pennisi *et al.* (23) have shown that low bone density and low bone formation markers, BAP and osteocalcin, were found in patients with severe atherosclerosis. In this study, we first investigated the statistical association of bone formation markers, osteocalcin and BAP, with atherosclerosis parameters. We found that serum osteocalcin level, but not BAP, was negatively associated with baPWV and IMT, independent of other atherosclerosis-related factors in diabetic men; this finding suggests that osteocalcin secreted from osteoblasts might be linked to atherosclerosis, although the amount of variability in the end point that was related to osteocalcin was generally small ( $r = -0.132$  to  $-0.177$ ). Recent evidence suggests that osteoblast-like cells are present in the vasculature and capable of calcifying vascular cells (24). Moreover, paracrine regulators of bone metabolism such as osteocalcin, matrix Gla protein (MGP), osteopontin, and bone morphogenetic protein are also present in atherosclerotic arteries (25). Thus, the vascular microenvironment possesses mechanisms similar to those in bone tissues to maintain mineral homeostasis. Both MGP and osteocalcin are known to be Gla-containing proteins. MGP is a secretory protein with widespread tissue expression, including in bone and vascular walls. MGP-knockout mice develop extensive calcification of arteries that rapidly becomes lethal, suggesting that MGP has an antimineralization role in the artery (26). In humans, osteocalcin is expressed parallel to MGP

in both normal and atherosclerotic vessels (25) and is also detected in human carotid arteries from endarterectomy samples (8). Thus, the two Gla proteins, osteocalcin and MGP, could play a pivotal role in not only bone mineralization but also vascular wall calcification. However, at present, little is known about whether serum osteocalcin secreted from osteoblasts in bone or osteoblast-like cells in vessels actually could modulate atherosclerosis. Thus, further studies are needed to clarify the pathophysiological processes underlying the relationship between serum osteocalcin level and atherosclerosis parameters.

The present study showed that serum osteocalcin level was negatively correlated with %Fat in men with diabetes and was positively correlated with serum total adiponectin level in postmenopausal women with diabetes. These findings suggest that osteocalcin is also associated with fat metabolism in persons with diabetes, although there were sex-related differences. Serum total and HMW adiponectins have been reported to be higher in postmenopausal women than men (27, 28), and our results also showed this sex-related adiponectin variability (Table 1). Ferron *et al.* (12) have shown that the addition of osteocalcin to cultured white and brown adipocytes enhanced adiponectin expression in a dose-dependent manner. These facts might partly explain the positive correlation between serum levels of osteocalcin and total adiponectin in postmenopausal women. On the other hand, we found no significant associations between osteocalcin and the parameters of atherosclerosis in postmenopausal women. These sex-related differences might depend on background data such as higher serum adiponectin level and a higher percentage of non-smokers among women than men.

This study has certain limitations in addition to not excluding subjects who underwent diabetes treatment. First, the sample size was not large enough to make definite conclusions. Second, we analyzed only subjects who visited Shimane University Hospital, a tertiary center, for evaluation or treatment of diabetes mellitus and osteoporosis. Therefore, the patients enrolled in this study might have relatively severe states of the disorders and might not be representative of other Japanese men and postmenopausal women with the disorders.

In conclusion, we found that serum osteocalcin levels were associated with glucose and total adiponectin levels, and fat mass as well as atherosclerosis parameters in patients with diabetes. These findings support the recent notion that osteocalcin is important for both bone metabolism and glucose metabolism and fat mass (11, 12).

## Acknowledgments

Address all correspondence and requests for reprints to: Toru Yamaguchi, M.D., Ph.D., Department of Internal Medicine 1, Shimane University School of Medicine, 89-1 Enya-cho, Izumo, Shimane, 693-8501, Japan. E-mail: yamaguch@med.shimane-u.ac.jp.

This work was supported by the Japanese Osteoporosis Association. Disclosure Summary: The authors have nothing to disclose.

## References

1. McFarlane SI, Muniyappa R, Shin JJ, Bathiyar G, Sowers JR 2004 Osteoporosis and cardiovascular disease: brittle bones and boded arteries, is there a link? *Endocrine* 23:1–10



2. Browner WS, Pressman AR, Nevitt MC, Cauley JA, Cummings SR 1993 Association between low bone density and stroke in elderly women. *Stroke* 24: 940–946
3. Tanko LB, Christiansen C, Cox DA, Geiger MJ, McNabb MA, Cummings SR 2005 Relationship between osteoporosis and cardiovascular disease in postmenopausal women. *J Bone Miner Res* 20:1912–1920
4. Vogt MT, San Valentin R, Forrest KY, Nevitt MC, Cauley JA 1997 Bone mineral density and aortic calcification: the Study of Osteoporotic Fractures. *J Am Geriatr Soc* 45:140–145
5. von der Recke P, Hansen MA, Hassager C 1999 The association between low bone mass at the menopause and cardiovascular mortality. *Am J Med* 106: 273–278
6. O'Brien KD, Kuusisto J, Reichenbach DD, Ferguson M, Giachelli C, Alpers CE, Otto CM 1995 Osteopontin is expressed in human aortic valvular lesions. *Circulation* 92:2163–2168
7. Shanahan CM, Cary NR, Metcalfe JC, Weissberg PL 1994 High expression of genes for calcification-regulating protein in human atherosclerotic plaques. *J Clin Invest* 93:2393–2402
8. Bini A, Mann KG, Kudryk BJ, Schoen FJ 1999 Noncollagenous bone matrix proteins, calcification, and thrombosis in carotid artery atherosclerosis. *Arterioscler Thromb Vasc Biol* 19:1852–1861
9. Hauschka PV, Lian JB, Cole DE, Gundberg CM 1989 Osteocalcin and matrix protein: vitamin K-dependent proteins in bone. *Physiol Rev* 69:990–1047
10. Price PA 1989 Gla-containing proteins of bone. *Connect Tissue Res* 21:51–57
11. Lee NK, Sowa H, Hinoi E, Ferron M, Ahn JD, Confavreux C, Dacquin R, Mee PJ, McKee MD, Jung DY, Zhang Z, Kim JK, Mauvais-Jarvis F, Ducy P, Karsenty G 2007 Endocrine regulation of energy metabolism by the skeleton. *Cell* 130:456–469
12. Ferron M, Hinoi E, Karsenty G, Ducy P 2008 Osteocalcin differentially regulates  $\beta$  cell and adipocyte gene expression and affects the development of metabolic diseases in wild-type mice. *Proc Natl Acad Sci USA* 105:5266–5270
13. Kaji H, Tobimatsu T, Naito J, Iu MF, Yamauchi M, Sugimoto T, Chihara K 2006 Body composition and vertebral fracture risk in female patients treated with glucocorticoid. *Osteoporos Int* 17:627–633
14. Sugimoto T, Nishiyama K, Kuribayashi F, Chihara K 1997 Serum levels of insulin-like growth factor (IGF) I, IGF-binding protein (IGFBP)-2, and IGFBP-3 in osteoporotic patients with and without spinal fractures. *J Bone Miner Res* 12:1272–1279
15. Kaji H, Nomura R, Yamauchi M, Chihara K, Sugimoto T 2006 The usefulness of bone metabolic indices for the prediction of changes in bone mineral density after parathyroidectomy in patients with primary hyperparathyroidism. *Horm Metab Res* 38:411–416
16. Friedewald WT, Levy RI, Fredrickson DS 1972 Estimation of the concentration of low-density lipoprotein cholesterol in plasma, without use of the preparative ultracentrifuge. *Clin Chem* 18:499–502
17. Kanazawa I, Yamaguchi T, Yamamoto M, Yamauchi M, Kurioka S, Yano S, Sugimoto T 2006 Serum DHEA-S level is associated with the presence of atherosclerosis in postmenopausal women with type 2 diabetes mellitus. *Endocr J* 55:667–675
18. Andoh N, Minami J, Ishimitsu T, Ohru M, Matsuoka H 2006 Relationship between markers of inflammation and brachial-ankle pulse wave velocity in Japanese men. *Int Heart J* 47:409–420
19. Verhaeghe J, Suiker AM, Nyomba BL, Visser WJ, Einhorn TA, Dequeker J, Bouillon R 1989 Bone mineral homeostasis in spontaneously diabetic BB rats. II. Impaired bone turnover and decreased osteocalcin synthesis. *Endocrinology* 124:573–582
20. Gerdhem P, Isaksson A, Akesson K, Obrant KJ 2005 Increased bone density and decreased bone turnover, but no evident alteration of fracture susceptibility in elderly women with diabetes mellitus. *Osteoporos Int* 16:1506–1512
21. Okazaki R, Totsuka Y, Hamano K, Ajima M, Miura M, Hirota Y, Hata K, Fukumoto S, Matsumoto T 1997 Metabolic improvement of poorly controlled noninsulin-dependent diabetes mellitus decreases bone turnover. *J Clin Endocrinol Metab* 82:2915–2920
22. Botolin S, McCabe LR 2006 Chronic hyperglycemia modulates osteoblast gene expression through osmotic and non-osmotic pathways. *J Cell Biochem* 99:411–424
23. Pennisi P, Signorelli SS, Riccobene S, Celotta G, Di Pino L, La Malfa T, Fiore CE 2004 Low bone density and abnormal bone turnover in patients with atherosclerosis of peripheral vessels. *Osteoporos Int* 15:389–395
24. Watson KE, Bostrom K, Ravindranath R, Lam T, Norton B, Demer LL 1994 TGF- $\beta$  1 and 25-hydroxycholesterol stimulate osteoblast-like vascular cells to calcify. *J Clin Invest* 93:2106–2113
25. Dore CR, Cleutjens JP, Lutgens E, Cleutjens KB, Geusens PP, Kitslaar PJ, Tordoir JH, Spronk HM, Vermeer C, Daemen MJ 2001 Differential expression of bone matrix regulatory proteins in human atherosclerotic plaques. *Arterioscler Thromb Vasc Biol* 21:1998–2003
26. Luo G, Ducy P, McKee MD, Pinero GJ, Loyer E, Behringer RR, Karsenty G 1997 Spontaneous calcification of arteries and cartilage in mice lacking matrix GLA protein. *Nature* 386:78–81
27. Pajvani UB, Hawkins M, Combs TP, Rajala MW, Doeber T, Berger JP, Wagner JA, Wu M, Knopps A, Xiang AH, Utzschneider KM, Kahn SE, Olefsky JM, Buchanan TA, Scherer PE 2004 Complex distribution, not absolute amount of adiponectin, correlates with thiazolidinedione-mediated improvement in insulin sensitivity. *J Biol Chem* 279:12152–12162
28. Waki H, Yamauchi T, Kamon J, Ito Y, Uchida S, Kita S, Hara K, Hada Y, Vasseur F, Froguel P, Kimura S, Nagai R, Kadowaki T 2003 Impaired multimerization of human adiponectin mutants associated with diabetes: molecular structure and multimer formation of adiponectin. *J Biol Chem* 278:40352–40363
